# Supplementary material
Source: publisher figshare collection journal article supplement (https://frontiersin.figshare.com/ndownloader/files/16251875)
Supplement: Supplementary file 1 [file 16251875]

**Supplementary Table 5. Descriptive statistics of alpha diversity indexes by field**

|  | Bacteria | | Fungi | |
| --- | --- | --- | --- | --- |
|  | richness | Evenness (smith-wilson) | richness | Evenness (smith-wilson) |
| **management*field** |  |  |  |  |
| 1-SandCONV | 2841±134 | 0.319±0.007 | 949±80 | 0.480±0.001 |
| 1-SandAECO | 2981±255 | 0.312±0.016 | 975±14 | 0.482±0.001 |
| 2-SandCONV | **3201±36a** | **0.292±0.004b** | **901±51b** | **0.489±0.001a** |
| 2-SandAECO | **3034±84b** | **0.301±0.002a** | **1084±52a** | **0.477±0.004b** |
| 3-SandCONV | **3406±67a** | **0.280±0.006b** | 969±35 | 0.486±0.001 |
| 3-SandAECO | **3175±38b** | **0.294±0.005a** | 987±23 | 0.483±0.002 |
| 1-SiltCONV | 2879±188 | 0.328±0.015 | **764±39b** | **0.491±0.004a** |
| 1-SiltAECO | 3028±115 | 0.314±0.012 | **922±49a** | **0.483±0.001b** |
| 2-SiltCONV | **2673±81b** | **0.344±0.004a** | **750±62b** | 0.493±0.004 |
| 2-SiltAECO | **2968±75a** | **0.306±0.007b** | **946±25a** | 0.488±0.001 |
| 3-SiltCONV | **2841±51b** | **0.330±0.004a** | **792±22b** | **0.496±0.001a** |
| 3-SiltAECO | **2996±71a** | **0.305±0.004b** | **881±29a** | **0.488±0.003b** |

Mean and standard deviation of the alpha diversity indexes for each management type (CONV=conventional and AECO=agroecological) in the six paired-fields (3 paired-fields in each textural site: 1, 2 and 3). The management effect was assessed in the six paired-fields separately using a pairwise test with the routine Permanova implemented in Primer6. Letters “a” and “b” represent the highest and the lowest values between the two management types for each pair. The significant tests are in bold.
